# Supplementary material for: Long Non-Coding RNA LINC00525 Promotes the Stemness and Chemoresistance of Colorectal Cancer by Targeting miR-507/ELK3 Axis
Source: PubMed Central journal article supplement — Int J Stem Cells. 2019 Jun 30;12(2):347–59. doi: 10.15283/ijsc19041 (PMC6657946; doi:10.15283/ijsc19041), 2019-06-30
Supplement: IJSC-12-347_Supple.pdf [file IJSC-12-347_Supple.pdf]

**Table S1.** Oligomers used in this study

| Name                      | Application          | Sequence                                                   |
|---------------------------|----------------------|------------------------------------------------------------|
| LINC00525-shRNA1-F        | plasmid construction | ccggGAAGAGTCAAGGCTTTATAGTggatccACTATAAAGCCTTGACTCTTCttttg  |
| LINC00525-shRNA1-R        | plasmid construction | aattcaaaaaGAAGAGTCAAGGCTTTATAGTggatccACTATAAAGCCTTGACTCTTC |
| LINC00525-shRNA2-F        | plasmid construction | ccggGTTGGACTGATCGTTCAATTTggatccAAATTGAACGATCAGTCCAACttttg  |
| LINC00525-shRNA2-R        | plasmid construction | aattcaaaaaGTTGGACTGATCGTTCAATTTggatccAAATTGAACGATCAGTCCAAC |
| LINC00525-clone-F         | plasmid construction | CTAGAAATC TGACGATGACCACCTT                                 |
| LINC00525-clone-R         | plasmid construction | CTAGGATCC TAATTAATAATAATA                                  |
| ELK3 CDS-clone-F          | plasmid construction | CTAGAAATC ATGGAGAGTGCAATCA                                 |
| ELK3 CDS-clone-R          | plasmid construction | CTAGGATCC TCAGGATTTCTGAGAGTTTG                             |
| LINC00525-DNA-1-sense     | lncRNA pull down     | (biotin-) GGACAAACAGTGAGGACTGCACCAACACTC                   |
| LINC00525-DNA-1-antisense | lncRNA pull down     | (biotin-) GAGTGTGGTGCAGTCCCTACTGTTTGTC                     |
| LINC00525-DNA-2-sense     | lncRNA pull down     | (biotin-) GAGACAGAAGACTTCATTTATTTGTCACAG                   |
| LINC00525-DNA-2-antisense | lncRNA pull down     | (biotin-) CTGTGACAAATAAATGAAGTCTTCTGTCTC                   |
| LINC00525-DNA-3-sense     | lncRNA pull down     | (biotin-) TCCTGACTAACTCTTGCGTTGTCAGACACT                   |
| LINC00525-DNA-3-antisense | lncRNA pull down     | (biotin-) AGTGTCTGACAACGCAAGAGTTAGTCAGGA                   |
| qrt-LINC00525-F           | qRT-PCR              | AGACCCTATGACTCCCG                                          |
| qrt-LINC00525-R           | qRT-PCR              | TTGGCAAGAAGCAAATC                                          |
| qrt-ELK3-F                | qRT-PCR              | ACCCAAAGGCTTGGAAATCT                                       |
| qrt-ELK3-R                | qRT-PCR              | TGTATGCTGGAGAGCAGTGG                                       |
| qrt-CD44-F                | qRT-PCR              | TGCCGCTTTGAGGTGTATT                                        |
| qrt-CD44-R                | qRT-PCR              | CCGATGCTCAGAGCTTCTCC                                       |
| qrt-SOX2-F                | qRT-PCR              | ACACCAATCCCATCCACACT                                       |
| qrt-SOX2-R                | qRT-PCR              | GCAAATTCCTGCAAAGCTC                                        |
| qrt-OCT4-F                | qRT-PCR              | TTGAGGCTCTGCAGCTTAG                                        |
| qrt-OCT4-R                | qRT-PCR              | GCCGGTTACAGAACCACAC                                        |
| qrt-GAPDH-F               | qRT-PCR              | ACAACCTTGGTATCGTGGAAGG                                     |
| qrt-GAPDH-R               | qRT-PCR              | GCCATCAGCCACAGTTTC                                         |
| qrt-miR-507-F             | qRT-PCR              | GCATTTTGACCTTTTGGA                                         |
| qrt-miR-507-R             | qRT-PCR              | GTGCAGGGTCCGAGGT                                           |
| qrt-U6-F                  | qRT-PCR              | TGCGGGTGCTCGCTTCGGCAGC                                     |
| qrt-U6-R                  | qRT-PCR              | GTGCAGGGTCCGAGGT                                           |
| U6-RT                     | RT                   | GTCGTATCCAGTGCAGGGTCCGAGGTATTCGCACTGGATACGACAAAATATGGAA    |
| miR-507-RT                | RT                   | GTCGTATCCAGTGCAGGGTCCGAGGTATTCGCACTGGATACGATCACT           |

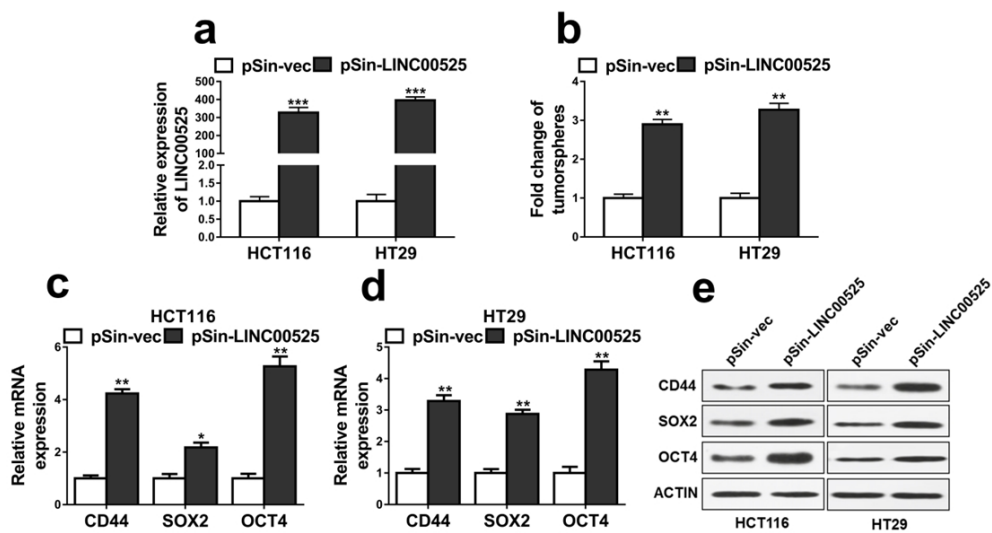

**Fig. S1.** Overexpression of LINC00525 promoted the stemness of colorectal cancer. (a) The relative expression levels of LINC00525 in HCT116 and HT29 cells transfected with LINC00525 plasmid (pSin-LINC00525) or empty vector (pSin-vec) were detected by qRT-PCR. (b) Overexpression of LINC00525 in HCT116 and HT29 cells significantly increased the capacity to form tumorspheres. (c~e) The levels of CD44, SOX2 and OCT4 were determined by qRT-PCR and western blot in HCT116 and HT29 cells transfected with LINC00525 plasmid (pSin-LINC00525) or empty vector (pSin-vec). The data represent as mean±SD from three independent experiments. \* $p < 0.05$ , \*\* $p < 0.01$ .
